1 **Title:** An Open-label Clinical Study of Brief Submaximal Cardiopulmonary Testing in Pre-  
2 surgical Evaluation: Feasibility of implementation.

3  
4  
5 Zyad J. Carr (M.D.)<sup>a, b</sup>, Daniel Agarkov (M.D.)<sup>a, b</sup>, Judy Li (B.S.)<sup>a</sup>, Jean Charchafliet (M.D.)<sup>a, b</sup>,  
6 Andres Brenes-Bastos (M.D.)<sup>a, b</sup>, Jonah Freund, (B.Sc., Candidate)<sup>a, b</sup>, Jill Zafar (M.D.)<sup>a, c</sup>, Robert  
7 B. Schonberger (M.D, M.H.C.D.S.)<sup>a, b</sup>, Paul Heerdt (M.D., Ph.D.)<sup>a, b</sup>

8  
9

10 <sup>a</sup>Yale University School of Medicine, New Haven, Connecticut USA

11  
12 <sup>b</sup>Department of Anesthesiology, Yale New Haven Hospital, New Haven, Connecticut USA

13  
14 <sup>c</sup>Department of Anesthesiology, Bridgeport Hospital, Bridgeport, Connecticut USA

15  
16 **Corresponding author:** Zyad J. Carr, M.D. 333 Cedar St., TMP-3, New Haven, Connecticut  
17 06510. (203)-785-3689. [zyad.carr@yale.edu](mailto:zyad.carr@yale.edu)

18  
19  
20  
21  
22  
23  
24  
25  
26  
27  
28  
29  
30  
31  
32  
33  
34  
35  
36  
37  
38  
39  
40  
41  
42  
43  
44  
45  
46

47 **Abstract**

48 **Objectives:** We tested the logistic feasibility of integrating brief submaximal cardiopulmonary  
49 exercise testing (smCPET) in a pre-surgical evaluation (PSE) clinic.

50 **Design:** Prospective open-label clinical device trial.

51 **Setting:** Pre-surgical evaluation clinic.

52 **Participants:** 43 participants who met criteria of i) age  $\geq 60$  years old, ii) revised cardiac risk  
53 index of  $\leq 2$ , iii) self-reported metabolic equivalents (METs) of  $\geq 4.6$  (i.e. ability to climb 2 flights  
54 of stairs), and iv) presenting for noncardiac surgery.

55 **Interventions:** Pre-intervention self-reported METs, Duke Activity Status Index (DASI)  
56 surveys, smCPET trial, Borg survey of perceived exertion, and post-intervention survey.

57 **Measurements:** Feasibility endpoints were 1) operational efficiency as measured by length of  
58 time of experimental session  $\leq 20$  minutes, 2) no more than moderate perceived physical  
59 exertion as quantified by a modified Borg survey of perceived exertion of  $\leq 7$  in the absence of  
60 observed complications, 3) high participant satisfaction with smCPET task execution,  
61 represented as a score of  $\geq 8$ , and 4) high patient satisfaction with scheduling of smCPET testing,  
62 represented as a score of  $\geq 8$ .

63 **Results:** Session time was 16.9 minutes ( $\pm 6.8$ ). Post-test modified Borg survey was 5.35 ( $\pm 1.8$ ),  
64 corresponding to moderate perceived exertion. Satisfaction [on a scale of 1 (worst) to 10 (best)]  
65 regarding ease of smCPET tasks was 9.6 ( $\pm 0.7$ ) and mean patient satisfaction with smCPET  
66 scheduling was 9.5 ( $\pm 1.5$ ). Operational efficiency was achieved after 10-15 experimental  
67 sessions.

68 **Conclusions:** Our findings suggest that smCPET integration in a PSE clinic; 1) is time efficient  
69 2) shows high participant satisfaction with task, and 3) rapidly achieved operational efficiency.

70  
71  
72  
73  
74  
75  
76  
77  
78  
79  
80  
81  
82  
83  
84  
85  
86  
87  
88  
89  
90  
91  
92

**Trial Registration:** ClinicalTrials.gov Registration: #NCT05743673. Principal Investigator: Zyad J. Carr, M.D. Date of Registration: 5-12-2023.

**Strengths and limitations of this study**

- We examined patient- and logistic-centered acceptance of study procedures within the environment of a high-volume preoperative surgical evaluation clinic.
- Study procedures were well tolerated, and participants readily accepted submaximal cardiopulmonary exercise testing with high satisfaction with device use, scheduling, and perceived exertion.
- User operational efficiency developed over 10-15 sessions of use.
- This feasibility study met our proposed endpoints but is comprised of a small sample of participants, limiting its generalizability to larger populations.

**Keywords:** Preoperative evaluation, submaximal cardiopulmonary exercise test, cardiac, pulmonary, evaluation, risk stratification

93 **Background**

94 Functional capacity or exercise tolerance, as measured by self-reported metabolic equivalents  
95 (METs), remains a cornerstone of preliminary assessment of fitness for surgery. METs are  
96 defined as multiples of the basal metabolic rate, conventionally defined as  $3.5 \text{ ml.kg}^{-1}.\text{min}^{-1}$ .  
97 Self-reported ability to climb one flight of stairs has a general consensus of 4 METs<sup>1</sup>. A  
98 threshold of <4.6 METs (self-reported inability to climb two flights of stairs) has been observed  
99 to correlate with major adverse cardiac events, all-cause mortality, and higher rates of  
100 perioperative complications<sup>2-4</sup>. However, self-reported and physician estimated METs remain  
101 insensitive in the accurate estimation of peak METs<sup>5 6</sup>. Similarly, preoperative risk prediction  
102 tools are fragmented or have demonstrated significant limitations in capturing at-risk populations  
103 prior to surgical evaluation<sup>7</sup>. Thus, simple, reliable, and sensitive methods to improve the  
104 precision of preoperative evaluation continues to be an area of importance in preoperative  
105 assessment and the individualized identification of high-risk patients.

106 Traditional cardiopulmonary exercise testing (CPET) provides objective assessments of  
107 cardiopulmonary performance by analyzing measures of cellular respiration at rest and during  
108 exercise. Typically performed by measuring resting gas exchange followed by commencement of  
109 maximal exercise to expose pathophysiological impairments. CPET usually exploits a symptom-  
110 limited approach to stationary-cycle ergometer-derived exercise with a 3-minute resting stage, 3  
111 minutes of unloaded cycling, and a 10-12 minute ramp stage with increasing resistance until  
112 terminated by the participant<sup>8</sup>. Abnormalities have been shown to be associated with  
113 perioperative morbidity after noncardiac surgery<sup>9</sup>. A peak  $\text{VO}_2$  of  $<15 \text{ ml/kg/min}$  has been  
114 frequently reported in the literature as a threshold for elevated perioperative cardiopulmonary  
115 complications in patients after thoracic and major noncardiac surgery<sup>10-13</sup>. In addition, CPET-

116 derived peak  $VO_2$  has been observed to predict surgical site infection, postoperative respiratory  
117 failure, and increased risk of critical care readmission but not 30-day mortality and non-fatal  
118 myocardial infarction<sup>14</sup>. Despite its prognostic value for perioperative complications, traditional  
119 CPET has been limited in its widespread adoption for preoperative evaluation due to limited  
120 availability, required technical skills, necessity of maximal patient effort, complexity of task, and  
121 cost.

122 In contrast to traditional CPET, submaximal cardiopulmonary exercise test (smCPET) utilizes  
123 graded exercise and concomitant gas exchange analysis to provide a granular and personalized  
124 assessment of cardiopulmonary performance<sup>8</sup>. Several advantages are provided by smCPET over  
125 traditional CPET. First, a submaximal exercise effort is required since it analyzes the oxygen  
126 uptake efficiency slope (OUES) to extrapolate reliable estimates of peak METs and peak  $VO_2$ <sup>15-</sup>  
127 <sup>17</sup>. The OUES predictive capability allows effort-independent estimation of extrapolated peak  
128 cardiopulmonary functional reserve, a particular advantage in deconditioned, frail, or  
129 functionally limited patient populations. Furthermore, as a time-limited assessment, smCPET  
130 may be efficiently integrated into conventional clinic schedules. Lastly, new devices have  
131 continued to miniaturize the smCPET footprint, permitting easy storage and transport. smCPET  
132 has demonstrated reliable prediction of length of stay and prediction of postoperative  
133 complications after noncardiac surgery<sup>18</sup>.

134 Despite these advantages, widespread adoption of smCPET for the purposes of preoperative  
135 evaluation has not been observed. Thus, it is unclear if smCPET can be feasibly integrated into a  
136 high-volume pre-surgical evaluation clinic setting.

137 **Study Objectives:** We examined the feasibility of integration of brief smCPET into a high-  
138 volume pre-surgical evaluation (PSE) clinic of a large quaternary care facility. This initial study

139 stage was performed for the purpose of determining the adequacy of study and patient-centered  
140 processes of the primary observational study which will examine the relationship of smCPET  
141 and perioperative outcomes, as measured by the postoperative morbidity survey (POMS)<sup>19</sup>. Our  
142 measured feasibility endpoints were 1) operational efficiency as measured by length of time of  
143 experimental session  $\leq 20$  minutes, 2) no more than moderate perceived physical exertion as  
144 quantified by a modified Borg survey of perceived exertion of  $\leq 7$  in the absence of observed  
145 complications, 3) high participant satisfaction with smCPET task execution, represented as a  
146 score of  $\geq 8$ , and 4) high patient satisfaction with scheduling of smCPET testing, represented as a  
147 score of  $\geq 8$ .

148 A prior study examining CPET and subjective clinician estimation had a sensitivity of 19.2% in  
149 the identification of patients with low functional capacity ( $\leq 4$  METs)<sup>14</sup>. We were interested in  
150 quantifying if this was also present in our feasibility cohort using smCPET equivalents.

151 Secondary outcomes included a comparison of differences between 1) self-reported METs  
152 survey vs. smCPET equivalent (extrapolated peak METs), 2) Duke Activity Status Index<sup>20</sup>  
153 (DASI) vs. smCPET equivalent (extrapolated peak METs) and 3) estimated DASI maximal  
154 oxygen consumption (estimated peak  $\text{VO}_2$ ) vs. smCPET equivalent (extrapolated peak  $\text{VO}_2$ ).

## 155 **Materials and Methods**

156 **Study Design:** This is an ongoing prospective open-label clinical device trial approved by the  
157 Yale University Institutional Review Board (IRB#2000033885; ClinicalTrials.gov Registry.  
158 #NCT05743673. Principal Investigator: Zyad J. Carr, M.D. Date of Registration: 5-12-2023).

159 **Study Population:** We successfully enrolled 43 participants who met the inclusion criteria of  
160 age  $\geq 60$  years old, with a revised cardiac risk index<sup>21</sup> of  $\leq 2$ , and self-endorsed subjective  
161 metabolic equivalents of  $\geq 4$ , presenting for moderate to high-risk noncardiac surgery. The aim

162 was to recruit 40 participants for this initial feasibility stage of the study. We estimated this  
163 number to be adequate to identify any study-related logistic process problems, patient-centered  
164 outcome deficiencies, and to determine operational efficiency.

165 We pre-screened by chart review and excluded potential participants with recorded severe or  
166 critical heart valve disease, active exertional angina, non-ambulation, gait abnormalities, end-  
167 stage renal disease, severe peripheral vascular disease, and neurological motor deficits. We  
168 excluded non-English speaking participants, those under legal guardianship, and participants  
169 documented to not have personal health care decision-making capacity. After pre-screening, a  
170 phone call was placed by a study team member to the potential participant, and eligible  
171 participants were invited for in-person informed consent, preoperative evaluation, questionnaire  
172 assessment of METs, and a smCPET experimental session.

173 **Testing Environment:** Testing was performed at the PSE Clinic at Yale New Haven Hospital  
174 which is typically responsible for approximately >40,000 preoperative evaluations per year. On a  
175 daily basis, the PSE clinic is staffed by an anesthesiologist, 2 resident physicians, 3 certified  
176 nurse practitioners and 6 nursing staff and contains six exam rooms.

177 **Study Apparatus:** The FDA-approved Shape II® system is a compact cardiopulmonary breath  
178 by breath exercise testing system that uses sub-maximal exercise effort to generate multiple  
179 quantitative measures of actual and extrapolated peak exercise tolerance. The device has been  
180 previously validated to conventional CPET measurements<sup>22</sup>. The compact design allows all the  
181 necessary equipment to be placed on a standard rolling cart and it was deployed in a PSE clinic  
182 examination room (2.4 x 2.4 meters). The device requires 2 minutes of baseline data, 3 minutes  
183 of escalating exercise using a stationary step and 1 minute of recovery data to generate a variety  
184 of individual measures of cardiac and pulmonary physiological data (**Supplementary Table 1**).

185 **Study procedures:** On presentation to the PSE clinic, participants received height/weight and  
186 vital sign measurements (heart rate, blood pressure and pulse oximetry). Informed consent was  
187 performed, and participants were instructed on smCPET testing (~5 minutes). Session time was  
188 measured from the beginning of pre-test METs questionnaires until the termination of the  
189 smCPET recovery phase. Study pre-test instruments included a self-reported 7-question METs  
190 assessment and the 12-question DASI survey. A post-test modified Borg survey of perceived  
191 exertion was performed after smCPET session and was recorded immediately after termination  
192 of the smCPET trial. After study interventions, a standard preoperative evaluation was  
193 completed, and the participant was discharged. A 24-hour post-experiment survey of  
194 minor/major complication and patient satisfaction was performed by telephone (**Supplementary**  
195 **Table 2**). With the exception of the patient satisfaction survey, all survey instruments were  
196 adapted from prior publications<sup>23-25</sup>. DASI peak METs and peak VO<sub>2</sub> was calculated from  
197 individual participants DASI score using the recommended formula.

198 **Data analysis:** Continuous variables are described as mean (standard deviation), ordinal  
199 variables as median (range), and categorical variables as number (percent).

## 200 **Results**

201 **Participant recruitment:** Participants were recruited from June 2023 through October 2023. We  
202 identified 209 potential participants that met eligibility criteria, 6 did not meet inclusion criteria,  
203 59 failed pre-screening criteria and 89 declined study participation (**Figure 2**). Initially 46



204 participants were enrolled but 3 were excluded (operator error: 2; surgery cancellation: 1) for a  
205 final cohort of 43 participants.

## 206 **Baseline characteristics:** Trial

207 participants had a median age of  
208 68 (range: 60-86 years old), 46.5%  
209 were female, and mean body mass  
210 index (BMI) was 27.5 ( $\pm 6.0$   
211  $\text{kg/m}^2$ ). Preoperative RCRI was a  
212 median of 1 (range: 1-2). Essential  
213 hypertension (51.2%),  
214 hyperlipidemia (39.5%) and solid

Figure 2

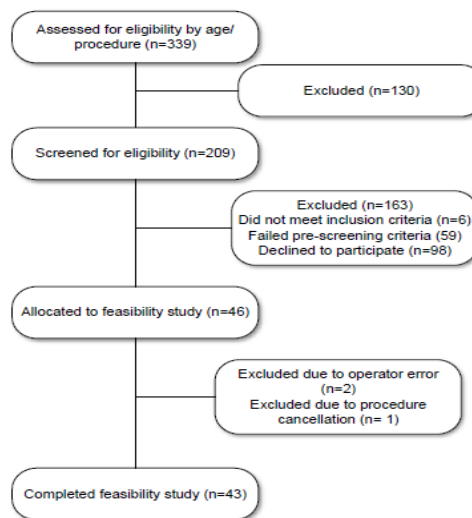

215 tumor (58.1%) were the most common pre-morbid conditions. Former or active smokers  
216 comprised 51.2% of the cohort. Major abdominal surgeries (62.8%) comprised the majority of  
217 the noncardiac surgical procedures. **Table 2** describes the baseline demographics of the study  
218 population.

219 **Feasibility and participant smCPET acceptability:** The mean (SD) experimental session time  
220 was 16.9 minutes ( $\pm 6.8$ ). The mean (SD) modified Borg survey after experimental sessions was  
221 5.35 ( $\pm 1.8$ ), corresponding to moderate perceived exertion. On 24-hour post-experimental  
222 session survey, a total of 43 (100%) of participants were reached. Mean (SD) patient satisfaction  
223 [on a scale of 1 (worst) to 10 (best)] was 9.5 ( $\pm 1.5$ ). The mean (SD) ease of performing smCPET  
224 tasks was reported as 9.6 ( $\pm 0.7$ ). Among this cohort, no major or minor complications associated  
225 with study testing were reported by participants (0/43; 0%). Operational efficiency was achieved  
226 within 10-15 experimental session among four study team members who trained on the device.

227 **Secondary measures:** Average self-reported peak METs was higher when compared to  
228 smCPET equivalent (extrapolated peak METs) [7.6 ( $\pm$ 2.0) vs. 6.7 ( $\pm$ 1.8)]. DASI estimated peak  
229 METs was higher when compared to smCPET equivalent (extrapolated peak METs) [8.8 ( $\pm$ 1.2)  
230 vs. 6.7 ( $\pm$ 1.8)]. DASI-estimated peak VO<sub>2</sub> was higher than smCPET equivalent (extrapolated  
231 peak VO<sub>2</sub>) [30.9 ( $\pm$ 4.3) vs. 23.6 ( $\pm$ 6.5)]. **Figure 3** provides a comparison of values obtained from  
232 smCPET compared to self-reported peak METs, DASI peak METs, and peak VO<sub>2</sub>.

### 233 Discussion

234 The integration of  
235 brief smCPET in a  
236 high-volume PSE  
237 clinic is feasible as  
238 measured by  
239 endpoints of session

Figure 3

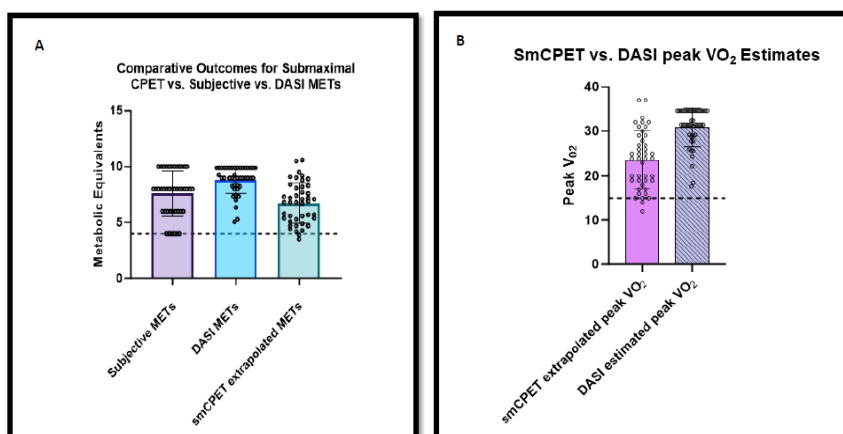

240 time, patient satisfaction with smCPET task execution, perceived exertion, and session  
241 scheduling. Secondly, operational efficiency of study team members was acceptable within 10-  
242 15 experimental sessions. Lastly, we observed consistent underestimation of self-reported METs,  
243 DASI peak METs, and DASI peak VO<sub>2</sub> when compared to smCPET equivalent values.  
244 We found that smCPET set-up, calibration, patient instruction, and execution of the study trial  
245 was time efficient. Mean session time was 16.9 minutes with rapid improvement over the study

246 time period as operators (n=4) became  
247 facile with the study instrument (Figure  
248 4). In fast paced, high-volume clinic  
249 environments, this efficiency is  
250 important, as patients are often seen  
251 short notice for preoperative evaluation.  
252 Given the short time requirement, we  
253 were able to flexibly arrange smCPET

Figure 4

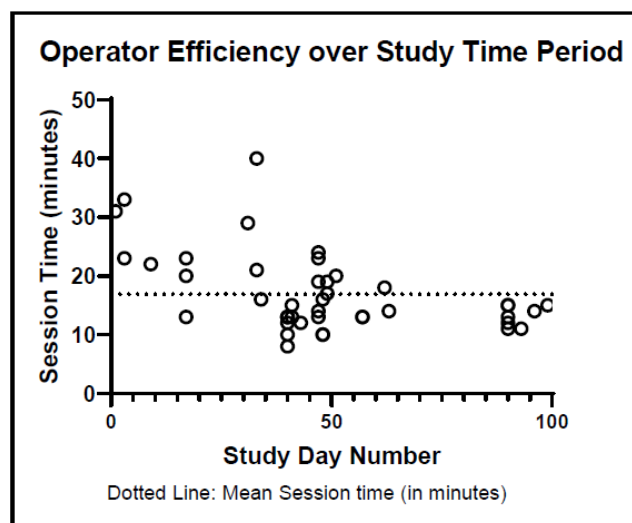

254 testing around other clinic appointments, facilitating successful study recruitment, and  
255 decreasing time burden on participants. PSE clinic-performed smCPET was also associated with  
256 a high level of patient satisfaction related to ease of task performance, and perceived exertion.  
257 The tested device uses a stair-step for graded exercise, which was often familiar to participants.  
258 The short duration of graded exercise, with automated verbal prompts to increase work rate by  
259 the device, was not perceived by any participant as maximum effort by Borg survey. No  
260 exercise-related major or minor complications were observed, and patients were consistently  
261 encouraged to safely provide maximal effort within the graded exercise portion of smCPET.  
262 Early termination of conventional CPET trials, due to participant fatigue or safety considerations,  
263 has been reported to be approximately 11%, no participant in our feasibility cohort elected early  
264 trial termination<sup>14</sup>. It is important to note that we selected for functionally independent  
265 participants with self-reported >4.6 METs, as represented by the ability to climb two flights of  
266 stairs, and expansion to less functional patients may result in higher failure rates. However,  
267 smCPET has been successfully tested in high-risk and frail populations, suggesting that a wide  
268 spectrum of preoperative populations could be tested using smCPET<sup>26-28</sup>.

269 In prior work, Wijeyesundera and colleagues<sup>14</sup> observed that subjective clinician estimation had a  
270 sensitivity of 19.2% in the identification of patients with low functional capacity ( $\leq 4$  METs)<sup>14</sup>.  
271 We observed that self-reported subjective METs and DASI estimated METs were, on average,  
272 lower than their smCPET equivalent (extrapolated peak METs). In our analysis, 18.6% (N=8/43)  
273 of participants self-reported their peak METs within 10% of smCPET extrapolated peak METs,  
274 27.9% of participants underestimated (N=12/43) and 53% (23/43) overestimated their peak  
275 METs by  $>10\%$ , respectively. smCPET identified that 18.6% (n=8) of our study cohort had  $\leq 4.7$   
276 extrapolated peak METs, correlating very closely to a METs threshold associated with higher  
277 perioperative cardiovascular morbidity and mortality. Furthermore, smCPET identified that  
278 20.9% of our cohort had an age adjusted peak  $\text{VO}_2$  of  $<20\text{ml/kg/min}$ , corresponding to poor  
279 aerobic capacity, and 4.6% of our cohort achieved an extrapolated peak  $\text{VO}_2 <15\text{ ml/kg/min}$ .  
280 It has been shown that conventional preoperative evaluation may not improve perioperative  
281 outcomes<sup>29</sup>. This may suggest a useful role for more precise risk stratification using brief  
282 smCPET in preoperative testing. Despite supporting evidence, widespread adoption of CPET and  
283 new generation smCPET devices has not been observed in preoperative testing. This is likely  
284 multifactorial due to limited awareness of new generation smCPET devices, perceived overhead  
285 cost, perceived time constraints, perceived operational complexity, and lack of clinical evidence  
286 regarding preoperative clinic integration. However, further knowledge of smCPET predictive  
287 validity and optimal system processes for selecting patients is required to identify its  
288 preoperative testing indications and its role in preoperative evaluation.

### 289 **Study Limitations**

290 This study had several limitations related to generalizability to other populations. As an open-  
291 label device clinical trial using a convenience sample of preoperative patients, we deliberately

292 excluded patients with high levels of comorbid conditions as quantified by RCRI. Although we  
293 are not able to generalize to this population, our goal was to establish feasibility of brief  
294 smCPET assessment within a presumed healthy but older perioperative cohort that would have  
295 likely not been captured by extensive preoperative evaluation. Secondly, although published data  
296 has validated smCPET predictive performance with perioperative cardiovascular morbidity and  
297 mortality, our cohort is not yet powered for assessment of these outcomes. Finally, our  
298 demonstration of no device-related adverse events is reassuring, but it should be cautiously  
299 interpreted given the small sample size and possibility of rare exercise-induced adverse events.

### 300 **Conclusions**

301 In summary, we observed that smCPET was well accepted into the workflow of a high-volume  
302 PSE clinic. All logistical, operational, and patient-centered feasibility endpoints were met.  
303 Operator efficiency with the smCPET instrument was rapid and achieved relative parity at Day  
304 30 or 10-15 sessions. This feasibility analysis has, 1) reinforced the structural integrity of our  
305 active study protocol assessing relationships of smCPET findings with perioperative outcomes,  
306 2) affirmed satisfactory patient-centered outcomes with the study procedures, and 3) provided  
307 insight into functional capacity variation in a cohort of older, but otherwise functionally  
308 independent, adult participants. Further studies should examine smCPET predictive validity and  
309 optimal system processes for patient selection.

### 310 **Statements & Declarations**

311 **Funding Sources:** This study was partially supported by Shape Medical Systems, Inc.  
312 (Minnesota, USA).

313 **Competing Interests:** The listed authors would like to disclose the following affiliations or  
314 involvements: ZJC receives partial funding from Shape Medical Systems, Inc. (Minnesota, USA)

315 related to the present work. RBS reports owning stock in Johnson and Johnson unrelated to the  
316 present work. RBS reports that Yale University has received funding from Merck for a study in  
317 which he was involved, unrelated to the present work. PH reported receiving research support  
318 grants from Edwards Lifesciences and consulting and/or royalty fees from Baudax Bio,  
319 FireFoundry, Cardiage LLC, and Edwards Lifesciences.

320 **Author Contributions:** Study conception and design were performed by Zyad J. Carr, Paul  
321 Heerdt, Robert B. Schonberger. The first draft of the manuscript was performed by Zyad J. Carr,  
322 Jean Charchaflich, Jill Zafar, Andres Brenes-Bastos. Data collection was performed by Zyad J.  
323 Carr, Jonah Freund, Judy Li, Daniel Agarkov. Statistical analysis was performed by Zyad J. Carr.  
324 Further manuscript editing was performed by all co-authors. All authors read and approved the  
325 final manuscript.

326 **Ethics Approval:** This study was performed in accordance with the principles of the Declaration  
327 of Helsinki. Approval was granted by the Yale University (New Haven, Connecticut, USA)  
328 Institutional Review Board (IRB#2000033885; ClinicalTrials.gov Registry. #NCT05743673.  
329 Principal Investigator: Zyad J. Carr, M.D. Date of Registration: 5-12-2023).

330 **Consent to participate:** Informed consent was obtained from all individual participants included  
331 in the study.

332 **Consent to publish:** All participant data is deidentified. Co-author Jonah Freund has given  
333 express written consent for publication of his image in Figure 1.

334 **Data Availability:** A deidentified data set is available on request to the corresponding author  
335 (Zyad J. Carr, [zyad.carr@yale.edu](mailto:zyad.carr@yale.edu)).

336 **Acknowledgements:** We would like to acknowledge the work of Rayna Lewoc, DNP, APRN,  
337 CRNA, Elizabeth Womack, Elizabeth Cozza, APRN, Gwendolyn Burkett, and the staff of the  
338 Yale-New Haven Hospital Pre-Surgical Evaluation Clinic.  
339

340 **Patient and Public Involvement:** Patient or the public were not involved in the design, or  
341 conduct, or reporting, or dissemination plans of our research.

342

343

## 344 **References**

345

- 346 1. Fleisher LA, Fleischmann KE, Auerbach AD, et al. 2014 ACC/AHA guideline on  
347 perioperative cardiovascular evaluation and management of patients undergoing  
348 noncardiac surgery: a report of the American College of Cardiology/American Heart  
349 Association Task Force on practice guidelines. *J Am Coll Cardiol* 2014;64(22):e77-137.  
350 doi: 10.1016/j.jacc.2014.07.944 [published Online First: 20140801]
- 351 2. Lurati Buse GAL, Puelacher C, Gualandro DM, et al. Association between self-reported  
352 functional capacity and major adverse cardiac events in patients at elevated risk  
353 undergoing noncardiac surgery: a prospective diagnostic cohort study. *British journal of*  
354 *anaesthesia* 2021;126(1):102-10. doi: 10.1016/j.bja.2020.08.041 [published Online First:  
355 20201017]
- 356 3. Reilly DF, McNeely MJ, Doerner D, et al. Self-reported exercise tolerance and the risk of  
357 serious perioperative complications. *Arch Intern Med* 1999;159(18):2185-92. doi:  
358 10.1001/archinte.159.18.2185
- 359 4. Biccard BM. Relationship between the inability to climb two flights of stairs and outcome  
360 after major non-cardiac surgery: implications for the pre-operative assessment of  
361 functional capacity. *Anaesthesia* 2005;60(6):588-93. doi: 10.1111/j.1365-  
362 2044.2005.04181.x
- 363 5. Weinstein AS, Sigurdsson MI, Bader AM. Comparison of Preoperative Assessment of  
364 Patient's Metabolic Equivalents (METs) Estimated from History versus Measured by  
365 Exercise Cardiac Stress Testing. *Anesthesiology research and practice*  
366 2018;2018:5912726. doi: 10.1155/2018/5912726 [published Online First: 20180903]
- 367 6. Nieves-Alonso JM, Méndez Hernández RM, Ramasco Rueda F, et al. Estimated metabolic  
368 equivalents of task do not correlate with the maximal oxygen consumption of patients  
369 undergoing lung resection surgery. *Rev Esp Anesthesiol Reanim (Engl Ed)*  
370 2022;69(7):437-41. doi: 10.1016/j.redare.2021.01.006 [published Online First:  
371 20220719]
- 372 7. Gray KD, Nobel TB, Hsu M, et al. Improved Preoperative Risk Assessment Tools Are Needed  
373 to Guide Informed Decision Making before Esophagectomy. *Annals of surgery*  
374 2023;277(1):116-20. doi: 10.1097/sla.0000000000004715
- 375 8. Glaab T, Taube C. Practical guide to cardiopulmonary exercise testing in adults. *Respiratory*  
376 *research* 2022;23(1):9. doi: 10.1186/s12931-021-01895-6
- 377 9. Argillander TE, Heil TC, Melis RJF, et al. Preoperative physical performance as predictor of  
378 postoperative outcomes in patients aged 65 and older scheduled for major abdominal  
379 cancer surgery: A systematic review. *Eur J Surg Oncol* 2022;48(3):570-81. doi:  
380 10.1016/j.ejso.2021.09.019 [published Online First: 20211001]
- 381 10. Loewen GM, Watson D, Kohman L, et al. Preoperative exercise Vo2 measurement for lung  
382 resection candidates: results of Cancer and Leukemia Group B Protocol 9238. *J Thorac*  
383 *Oncol* 2007;2(7):619-25. doi: 10.1097/JTO.0b013e318074bba7



- 384 11. Benzo R, Kelley GA, Recchi L, et al. Complications of lung resection and exercise capacity:  
385 a meta-analysis. *Respiratory medicine* 2007;101(8):1790-7. doi:  
386 10.1016/j.rmed.2007.02.012 [published Online First: 20070403]
- 387 12. Hartley RA, Pichel AC, Grant SW, et al. Preoperative cardiopulmonary exercise testing and  
388 risk of early mortality following abdominal aortic aneurysm repair. *British Journal of*  
389 *Surgery* 2012;99(11):1539-46. doi: 10.1002/bjs.8896
- 390 13. Older P, Hall A, Hader R. Cardiopulmonary exercise testing as a screening test for  
391 perioperative management of major surgery in the elderly. *Chest* 1999;116(2):355-62.  
392 doi: 10.1378/chest.116.2.355
- 393 14. Wijeyesundera DN, Pearse RM, Shulman MA, et al. Assessment of functional capacity before  
394 major non-cardiac surgery: an international, prospective cohort study. *Lancet (London,*  
395 *England)* 2018;391(10140):2631-40. doi: 10.1016/s0140-6736(18)31131-0
- 396 15. Ferguson M, Shulman M. Cardiopulmonary Exercise Testing and Other Tests of Functional  
397 Capacity. *Curr Anesthesiol Rep* 2021:1-8. doi: 10.1007/s40140-021-00499-6 [published  
398 Online First: 2021/11/30]
- 399 16. Baba R, Nagashima M, Goto M, et al. Oxygen uptake efficiency slope: a new index of  
400 cardiorespiratory functional reserve derived from the relation between oxygen uptake and  
401 minute ventilation during incremental exercise. *J Am Coll Cardiol* 1996;28(6):1567-72.  
402 doi: 10.1016/s0735-1097(96)00412-3
- 403 17. Hollenberg M, Tager IB. Oxygen uptake efficiency slope: an index of exercise performance  
404 and cardiopulmonary reserve requiring only submaximal exercise. *J Am Coll Cardiol*  
405 2000;36(1):194-201. doi: 10.1016/s0735-1097(00)00691-4
- 406 18. Snowden CP, Prentis JM, Anderson HL, et al. Submaximal cardiopulmonary exercise testing  
407 predicts complications and hospital length of stay in patients undergoing major elective  
408 surgery. *Annals of surgery* 2010;251(3):535-41. doi: 10.1097/SLA.0b013e3181cf811d
- 409 19. Grocott MP, Browne JP, Van der Meulen J, et al. The Postoperative Morbidity Survey was  
410 validated and used to describe morbidity after major surgery. *J Clin Epidemiol*  
411 2007;60(9):919-28. doi: 10.1016/j.jclinepi.2006.12.003 [published Online First:  
412 20070507]
- 413 20. Hlatky MA, Boineau RE, Higginbotham MB, et al. A brief self-administered questionnaire to  
414 determine functional capacity (the Duke Activity Status Index). *Am J Cardiol*  
415 1989;64(10):651-4. doi: 10.1016/0002-9149(89)90496-7
- 416 21. Ford MK, Beattie WS, Wijeyesundera DN. Systematic review: prediction of perioperative  
417 cardiac complications and mortality by the revised cardiac risk index. *Annals of internal*  
418 *medicine* 2010;152(1):26-35. doi: 10.7326/0003-4819-152-1-201001050-00007
- 419 22. Miller AD, Woods P.R., Olson T.P., Hulsebus M.L., O'Malley K.A., MacCarter D., Johnson  
420 B.D. Validation of a Simplified, Portable Cardiopulmonary Gas Exchange  
421 System for Submaximal Exercise Testing. *The Open Sports Medicine Journal* 2010;4:34-40. doi:  
422 10.2174/1874387001004010034
- 423 23. Borg GA. Psychophysical bases of perceived exertion. *Medicine and science in sports and*  
424 *exercise* 1982;14(5):377-81.
- 425 24. McAuley P, Myers J, Abella J, et al. Evaluation of a specific activity questionnaire to predict  
426 mortality in men referred for exercise testing. *Am Heart J* 2006;151(4):890.e1-7. doi:  
427 10.1016/j.ahj.2005.09.017
- 428 25. Bell EC, Cox NS, Goh N, et al. Oxygen therapy for interstitial lung disease: a systematic  
429 review. *Eur Respir Rev* 2017;26(143) doi: 10.1183/16000617.0080-2016



- 430 10.1183/16000617.0080-2016. Print 2017 Jan. [published Online First: 2017/02/23]  
431 26. Oakland HT, Joseph P, Elassal A, et al. Diagnostic utility of sub-maximum cardiopulmonary  
432 exercise testing in the ambulatory setting for heart failure with preserved ejection  
433 fraction. *Pulm Circ* 2020;10(4):2045894020972273. doi: 10.1177/2045894020972273  
434 [published Online First: 20201125]  
435 27. Bernstein EJ, Mandl LA, Gordon JK, et al. Submaximal heart and pulmonary evaluation: a  
436 novel noninvasive test to identify pulmonary hypertension in patients with systemic  
437 sclerosis. *Arthritis Care Res (Hoboken)* 2013;65(10):1713-8. doi: 10.1002/acr.22051  
438 28. Woods PR, Frantz RP, Taylor BJ, et al. The usefulness of submaximal exercise gas exchange  
439 to define pulmonary arterial hypertension. *J Heart Lung Transplant* 2011;30(10):1133-  
440 42. doi: 10.1016/j.healun.2011.03.021 [published Online First: 20110531]  
441 29. Beckerleg W, Kobewka D, Wijeyesundera DN, et al. Association of Preoperative Medical  
442 Consultation With Reduction in Adverse Postoperative Outcomes and Use of Processes  
443 of Care Among Residents of Ontario, Canada. *JAMA Intern Med* 2023;183(5):470-78.  
444 doi: 10.1001/jamainternmed.2023.0325  
445  
446

## 447 Figure Legends

448  
449 **Figure 1.** A visual representation of the smCPET device in the PSE Clinic. (Model: co-author  
450 JF)

451  
452 **Figure 2.** A Flow Diagram of Participant Enrollment.

453  
454 **Figure 3.** Figure 3a reports differences between estimated peak METs between self-reported and  
455 extrapolated peak METs derived from smCPET. Figure 3b reports differences between Duke  
456 Activity Status Index estimated peak VO<sub>2</sub> and submaximal CPET extrapolated peak VO<sub>2</sub>.  
457

458 **Figure 4.** Operator Efficiency Measured by Session Time over the Study Time Period.  
459

460 **Table 1.** Baseline Demographical Data of the Study Cohort (n=43).  
461

462 **Supplementary Table 1.** Summary and Selected Measurements of Submaximal  
463 Cardiopulmonary Exercise Testing.  
464

465 **Supplementary Table 2.** Adapted Subjective METs Survey.  
466  
467  
468

**Table 1. Baseline Demographical Data of the Study Cohort (n=43)**

|                                                   |      |         |
|---------------------------------------------------|------|---------|
| Age, in years, median (range)                     | 68   | (60-86) |
| Gender                                            |      |         |
| Male                                              | 23   | (53.5%) |
| Female                                            | 20   | (46.5%) |
| Body Mass Index, in m/kg <sup>2</sup> , mean (SD) | 27.5 | (±6.0)  |

| Revised Cardiac Risk Index Score, median (Range) | 1  | (1-2)   |
|--------------------------------------------------|----|---------|
| <b>Preoperative Comorbidities</b>                |    |         |
| Essential Hypertension                           | 22 | (51.2%) |
| Hyperlipidemia                                   | 17 | (39.5%) |
| Ventricular Dysrhythmia                          | 1  | (2.3%)  |
| Congestive Heart Failure                         | 1  | (2.3%)  |
| Myocardial Infarction                            | 3  | (7.0%)  |
| Cerebrovascular Disease                          | 1  | (2.3%)  |
| Chronic Obstructive Pulmonary Disease            | 3  | (7.0%)  |
| Asthma                                           | 4  | (9.3%)  |
| Obstructive Sleep Apnea                          | 3  | (7.0%)  |
| History of Prior Lung Resection                  | 1  | (2.3%)  |
| Diabetes Mellitus                                | 7  | (16.3%) |
| Thyroid Disorders                                | 7  | (16.3%) |
| Solid Tumor                                      | 25 | (58.1%) |
| Anemia                                           | 1  | (2.3%)  |
| <b>Social History</b>                            |    |         |
| <b>Smoking</b>                                   |    |         |
| Active                                           | 4  | (9.3%)  |
| Former                                           | 18 | (41.9%) |
| Never                                            | 21 | (48.8%) |
| Marijuana Use (active)                           | 4  | (9.3%)  |
| <b>Alcohol Use</b>                               |    |         |
| Active                                           | 24 | (55.8%) |
| Former                                           | 16 | (37.2%) |
| Never                                            | 3  | (7.0%)  |
| <b>Cardiovascular Medication Use</b>             |    |         |
| Beta-blocker                                     | 14 | (32.6%) |
| Calcium channel antagonist                       | 9  | (20.9%) |
| ACE/ARB antagonist                               | 16 | (37.2%) |
| Diuretic                                         | 12 | (27.9%) |
| <b>Surgical Categories</b>                       |    |         |
| Abdominal Major                                  | 27 | (62.8%) |
| Musculoskeletal Major                            | 4  | (9.3%)  |
| Neurosurgical Major                              | 2  | (4.7%)  |
| Thoracic Major                                   | 5  | (11.6%) |
| Other Major                                      | 5  | (11.6%) |

469  
470  
471  
472  
473  
474  
475

**Supplementary Table 1. Selected Measurements of Submaximal Cardiopulmonary Exercise Testing.**

| Variable                                                                                                                                                                                                                                                                                                                                                                                                                                                                                                                                                                                                                                                                                                              | Description                                                          | Commentary                                                                                                                                                                                                                                                                 |
|-----------------------------------------------------------------------------------------------------------------------------------------------------------------------------------------------------------------------------------------------------------------------------------------------------------------------------------------------------------------------------------------------------------------------------------------------------------------------------------------------------------------------------------------------------------------------------------------------------------------------------------------------------------------------------------------------------------------------|----------------------------------------------------------------------|----------------------------------------------------------------------------------------------------------------------------------------------------------------------------------------------------------------------------------------------------------------------------|
| <b>Summary of Shape II® metabolic analyzer used in study:</b> The device uses breath by breath sampling during calibration and exercise challenge using a differential pressure pneumotach method for volume calibration and measurement, an infrared sensor for CO <sub>2</sub> and a paramagnetic sensor for O <sub>2</sub> measurements. Automated calibration using a calibration gas mixture (15.6% O <sub>2</sub> /5% CO <sub>2</sub> ) is performed at regular intervals. The Shape II calculations used for causes of exertional dyspnea differentiation are Artificial Intelligence (AI) based algorithms previously calibrated and validated against conventional cardiopulmonary exercise testing methods. |                                                                      |                                                                                                                                                                                                                                                                            |
| HR (resting)                                                                                                                                                                                                                                                                                                                                                                                                                                                                                                                                                                                                                                                                                                          | Resting heart rate                                                   | Measured during 1st stage prior to exercise.                                                                                                                                                                                                                               |
| HR (peak)                                                                                                                                                                                                                                                                                                                                                                                                                                                                                                                                                                                                                                                                                                             | Peak heart rate achieved during exercise                             | Measured during 2nd stage during exercise.                                                                                                                                                                                                                                 |
| % HR reserve utilized                                                                                                                                                                                                                                                                                                                                                                                                                                                                                                                                                                                                                                                                                                 | Percentage of heart rate reserve utilized                            | Percentage of resting heart rate and the age-dependent predicted maximum heart rate                                                                                                                                                                                        |
| % HR max predicted attained                                                                                                                                                                                                                                                                                                                                                                                                                                                                                                                                                                                                                                                                                           | Percentage of predicted maximum achieved heart rate                  | Difference between maximum measured heart rate during exercise and age-dependent estimated maximum heart rate.                                                                                                                                                             |
| CRI                                                                                                                                                                                                                                                                                                                                                                                                                                                                                                                                                                                                                                                                                                                   | Chronotropic Recovery Index                                          | A measure of heart rate recovery after exercise                                                                                                                                                                                                                            |
| RR rest                                                                                                                                                                                                                                                                                                                                                                                                                                                                                                                                                                                                                                                                                                               | Respiratory rate at rest                                             | Measured during 1st stage prior to exercise.                                                                                                                                                                                                                               |
| RR end exercise                                                                                                                                                                                                                                                                                                                                                                                                                                                                                                                                                                                                                                                                                                       | End-exercise respiratory rate                                        | Measured during 2nd stage during exercise.                                                                                                                                                                                                                                 |
| End-tidal CO <sub>2</sub> (rest)                                                                                                                                                                                                                                                                                                                                                                                                                                                                                                                                                                                                                                                                                      | End-tidal carbon dioxide, at rest                                    | Influenced by cardiac output, pulmonary vascular resistance, and chronic hypoventilation syndromes                                                                                                                                                                         |
| End-tidal CO <sub>2</sub> (peak)                                                                                                                                                                                                                                                                                                                                                                                                                                                                                                                                                                                                                                                                                      | End-tidal carbon dioxide, peak exercise                              | Peak carbon dioxide during exercise                                                                                                                                                                                                                                        |
| Resting SpO <sub>2</sub>                                                                                                                                                                                                                                                                                                                                                                                                                                                                                                                                                                                                                                                                                              | Resting pulse oximetry                                               | Resting peripheral oxygenation                                                                                                                                                                                                                                             |
| Peak SpO <sub>2</sub>                                                                                                                                                                                                                                                                                                                                                                                                                                                                                                                                                                                                                                                                                                 | Peak exercise pulse oximetry                                         | Peak exercise peripheral oxygenation                                                                                                                                                                                                                                       |
| RER                                                                                                                                                                                                                                                                                                                                                                                                                                                                                                                                                                                                                                                                                                                   | Respiratory Exchange Ratio                                           | Ratio between metabolic production of CO <sub>2</sub> and uptake of O <sub>2</sub>                                                                                                                                                                                         |
| VE/VCO <sub>2</sub> slope                                                                                                                                                                                                                                                                                                                                                                                                                                                                                                                                                                                                                                                                                             | Minute ventilation/CO <sub>2</sub> production slope                  | Breathing efficiency slope reflects the efficiency of elimination of CO <sub>2</sub>                                                                                                                                                                                       |
| Δ EtCO <sub>2</sub> (rest to end exercise)                                                                                                                                                                                                                                                                                                                                                                                                                                                                                                                                                                                                                                                                            | Change in end-tidal carbon dioxide during exercise                   | A measure of cardiac output and pulmonary blood flow                                                                                                                                                                                                                       |
| Gxcap (peak)                                                                                                                                                                                                                                                                                                                                                                                                                                                                                                                                                                                                                                                                                                          | Gas exchange-derived pulmonary vascular capacitance at peak exercise | Shown to correlate with cardiac output and inversely with pulmonary vascular resistance (PVR) and DLCO; in patients with PAH or PVH, Gxcap is reduced due to increased PVR.                                                                                                |
| OUES (linear slope)                                                                                                                                                                                                                                                                                                                                                                                                                                                                                                                                                                                                                                                                                                   | Oxygen uptake efficiency slope, percentage of expected               | Assesses how well oxygen is extracted from the inhaled air, distributed to the muscles by the cardiopulmonary system, and utilized by the muscles in energy metabolism; Particularly valuable in assessing exercise capacity and response to medications or rehabilitation |
| Peak Attained METs                                                                                                                                                                                                                                                                                                                                                                                                                                                                                                                                                                                                                                                                                                    | Metabolic Equivalent                                                 | Metabolic equivalents attained during submaximal exercise.                                                                                                                                                                                                                 |
| Peak Extrapolated METs                                                                                                                                                                                                                                                                                                                                                                                                                                                                                                                                                                                                                                                                                                | Metabolic Equivalent                                                 | Peak estimated metabolic equivalents                                                                                                                                                                                                                                       |
| O <sub>2</sub> pulse                                                                                                                                                                                                                                                                                                                                                                                                                                                                                                                                                                                                                                                                                                  | Amount of oxygen consumed per heartbeat                              |                                                                                                                                                                                                                                                                            |
| Sub-maximal VO <sub>2</sub> (peak attained)                                                                                                                                                                                                                                                                                                                                                                                                                                                                                                                                                                                                                                                                           | Sub-maximal exercise oxygen uptake                                   | Achieved peak maximal oxygen uptake during submaximal exercise.                                                                                                                                                                                                            |
| Extrapolated maximum VO <sub>2</sub>                                                                                                                                                                                                                                                                                                                                                                                                                                                                                                                                                                                                                                                                                  | Predicted maximal exercise oxygen uptake                             | Calculated peak maximal oxygen uptake.                                                                                                                                                                                                                                     |

|                                                  |                                                                                                                                                                       |                                                                                                                                                                |
|--------------------------------------------------|-----------------------------------------------------------------------------------------------------------------------------------------------------------------------|----------------------------------------------------------------------------------------------------------------------------------------------------------------|
| MVI score                                        | Dimensionless; (cumulative sum score)                                                                                                                                 | Combined cardiopulmonary index with threshold value of normal vs. impairment.                                                                                  |
| Cardiac disease silo score                       | Dimensionless; (cumulative sum score)                                                                                                                                 | Parameters: VE/VCO <sub>2</sub> slope, O <sub>2</sub> pulse to VO <sub>2</sub> slope, circulatory equivalents, HR recovery                                     |
| Pulmonary Vascular Disease silo score            | Dimensionless; (cumulative sum score)                                                                                                                                 | Parameters: VE/VCO <sub>2</sub> slope, peak Gx <sub>cap</sub> , resting SpO <sub>2</sub> , SpO <sub>2</sub> desaturation                                       |
| Chronic Obstructive Pulmonary Disease silo score | Dimensionless; (cumulative sum score)                                                                                                                                 | Parameters: FEV1 % Predicted, breathing reserve, SpO <sub>2</sub> desaturation, P mixed expired CO <sub>2</sub> /P end-tidal CO <sub>2</sub> ratio (V/Q ratio) |
| Restrictive Lung Disease silo score              | Dimensionless; (cumulative sum score)                                                                                                                                 | Parameters: FVC % Predicted, SpO <sub>2</sub> desaturation, VT max / VT rest, RR/VCO <sub>2</sub> slope (lung stiffness)                                       |
| De-conditioning silo score                       | Dimensionless; (cumulative sum score)                                                                                                                                 | Parameters: extrapolated peak VO <sub>2</sub> , % ideal BMI, HR to VO <sub>2</sub> linear regression slope, HR recovery 1 minute post exercise                 |
| V/Q plot                                         | Dimensionless; (cumulative sum score); (Normal, Left ventricular dysfunction, Chronic Obstructive Pulmonary Disease, Transitional or Pulmonary Arterial Hypertension) | Assesses which physiological area may contribute to visualized impairments during submaximal exercise testing.                                                 |
| AwCap peak (VT pk x PECO <sub>2</sub> peak)      | airway capacitance; L x mmHg                                                                                                                                          | Airway Capacitance                                                                                                                                             |
| VT pk (peak attained VT)                         | Peak attained tidal volume in L/min                                                                                                                                   | Value obtained during exercise.                                                                                                                                |
| VE peak (peak attained VE)                       | Peak attained minute ventilation in L/min                                                                                                                             | Value obtained during exercise.                                                                                                                                |

Abbreviations: HR; heart rate; CRI; chronotropic Recovery Index; RR; respiratory rate (in breaths/min); CO<sub>2</sub>; carbon dioxide; SpO<sub>2</sub>; pulse oximetry; RER; respiratory Exchange Ratio; Gx<sub>cap</sub>; pulmonary arterial capacitance; OUES; oxygen uptake efficiency slope; METs; metabolic equivalents; VO<sub>2</sub>; oxygen consumption; MVI; multivariable index; VE; minute ventilation; VT; tidal volume; AwCap; airway capacitance.

476  
477  
478  
479  
480  
481  
482  
483  
484  
485  
486  
487  
488  
489  
490  
491  
492

| <b>Supplementary Table 2. Adapted Self-Reported Subjective Metabolic Equivalents Survey</b>                                               |                                 |                |
|-------------------------------------------------------------------------------------------------------------------------------------------|---------------------------------|----------------|
| Question                                                                                                                                  | Estimated Metabolic Equivalents | Accepted value |
| <i>Can you perform the following activities (yes/no)</i>                                                                                  |                                 |                |
| Watching television, writing, desk work?                                                                                                  | 1-2                             | 2              |
| Walk slowly on level ground (1.7mph)                                                                                                      | 2-3                             | 3              |
| Climb two flights of stairs, without stopping to rest?                                                                                    | 3-5                             | 4              |
| Walk at moderate pace on level ground (3mph/20 minute mile), ride a stationary bicycle at very light intensity or vacuum around the home? | 3-5                             | 4              |
| Ride a stationary bicycle at moderate intensity?                                                                                          | 5-6                             | 6              |
| Jogging, fast swimming, play soccer or tennis?                                                                                            | 7-8                             | 8              |
| Run a 7.5 minute/mile, jump-rope 100 skips/minute, run up the stairs                                                                      | 10-13                           | 10             |

493
